# Supplementary material
Source: PubMed Central journal article supplement (PMC2690641)

## Thresholds - Ascending Method of Limits

|                   |   |   |
|-------------------|---|---|
| First sensation   | X | X |
| Urgency           | X | X |
| Discomfort        | X | X |
| Pain              | X | X |
| Rectal compliance | X | X |

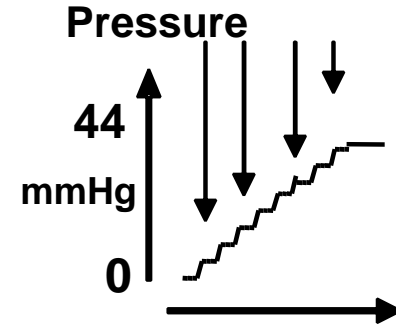

## Sensory Intensity (VAS) – Random phasic distentions

|            |   |   |
|------------|---|---|
| Gas        | X | X |
| Urgency    | X | X |
| Discomfort | X | X |
| Pain       | X | X |

Day 1 Pre-dose

Day 6, post-dosing

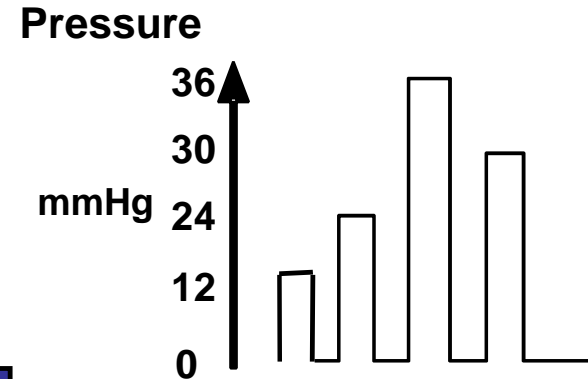

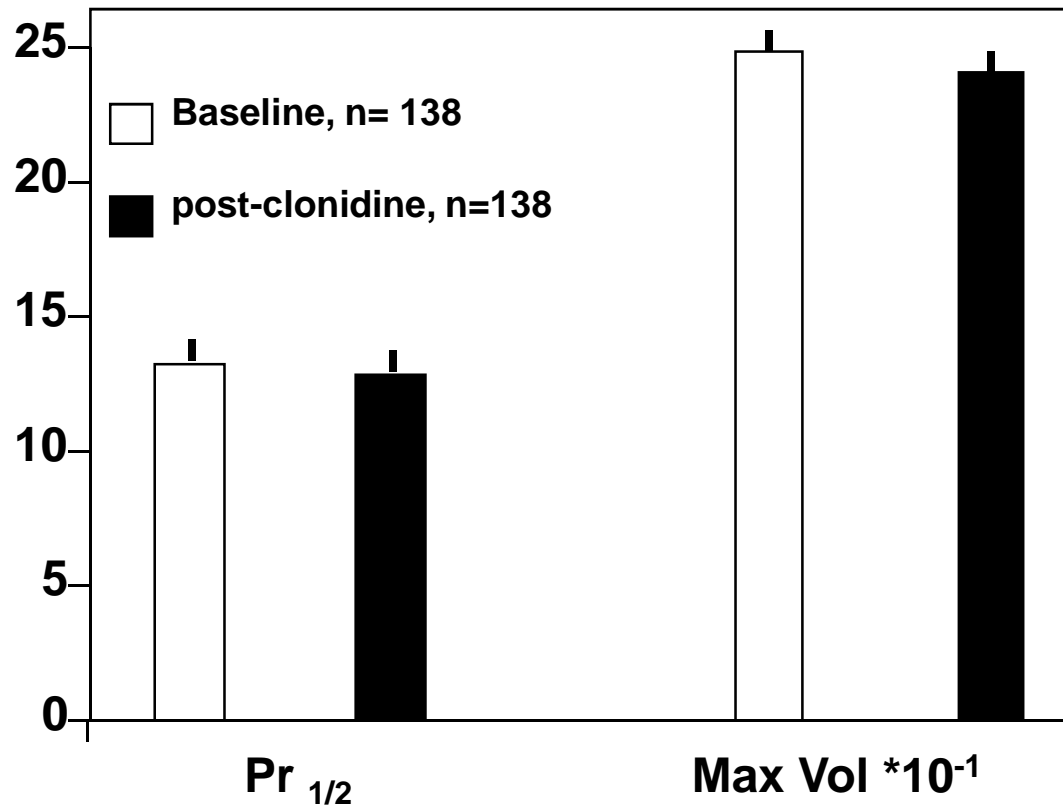

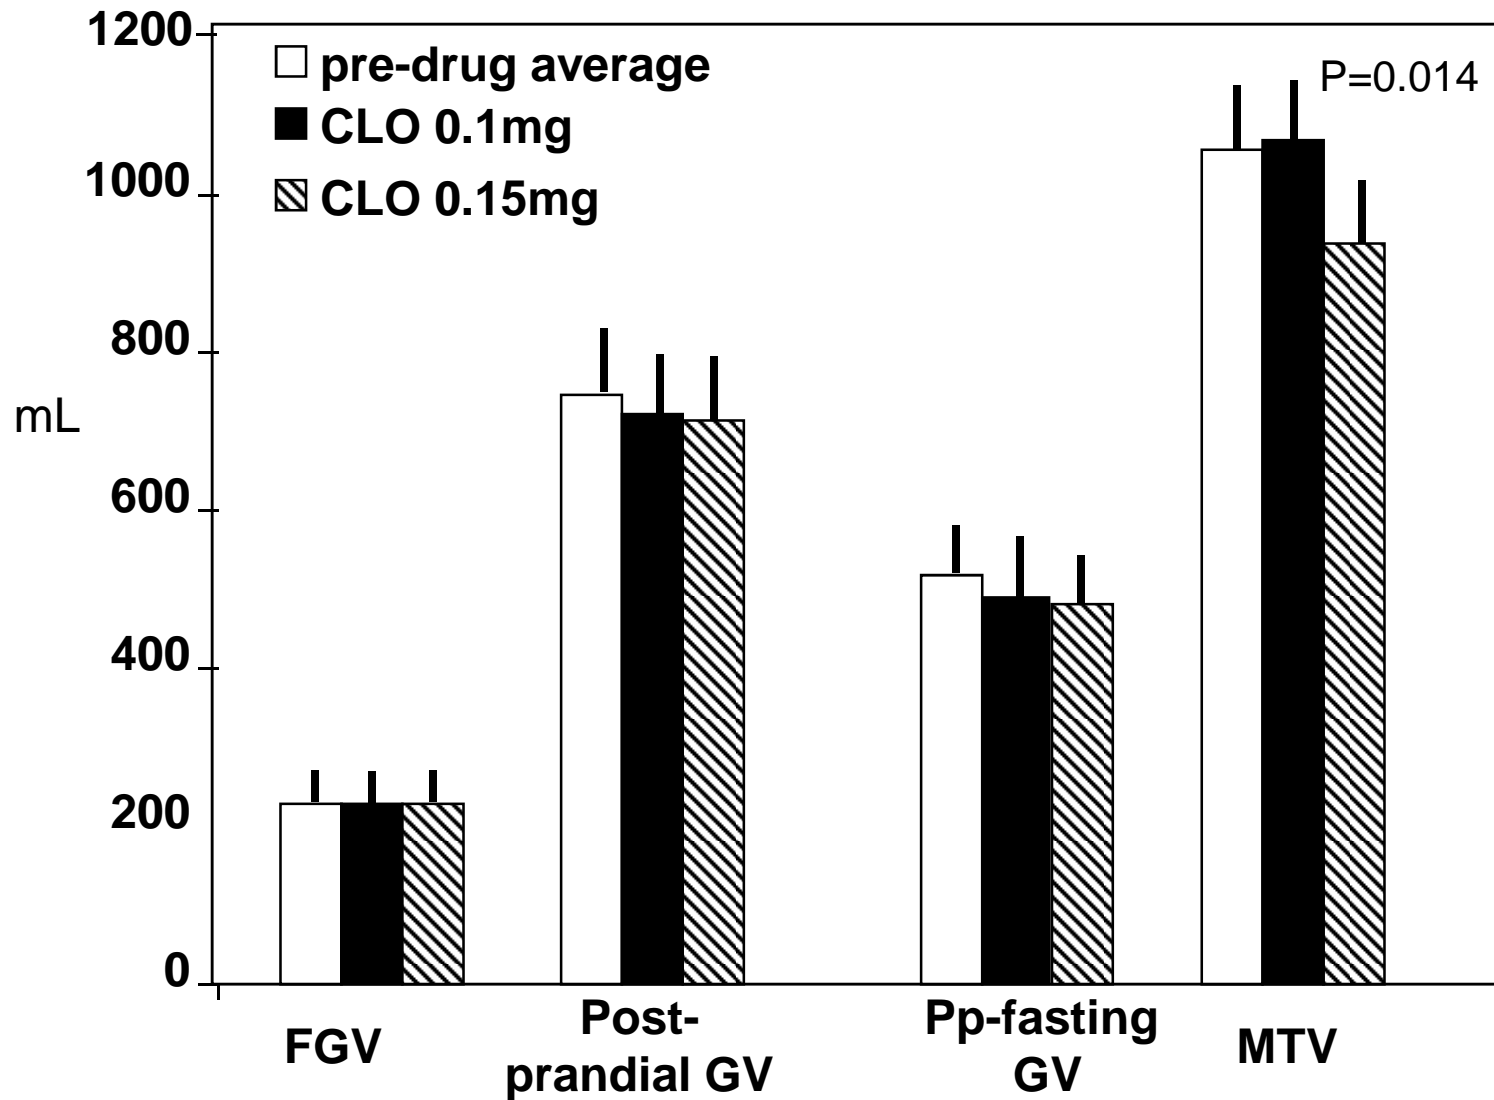

Supplement: NIHMS111327-supplement-01.pdf [file NIHMS111327-supplement-01.pdf]
